# Supplementary material for: Changes in Gut Microbiota Control Metabolic Endotoxemia-Induced Inflammation in High-Fat Diet–Induced Obesity and Diabetes in Mice
Source: Oxford University Press journal article supplement (doi:10.2337/db07-1403), 2008-02-28
Supplement: db071403supplementaryfigures1-2.doc [file db071403supplementaryfigures1-2.doc]

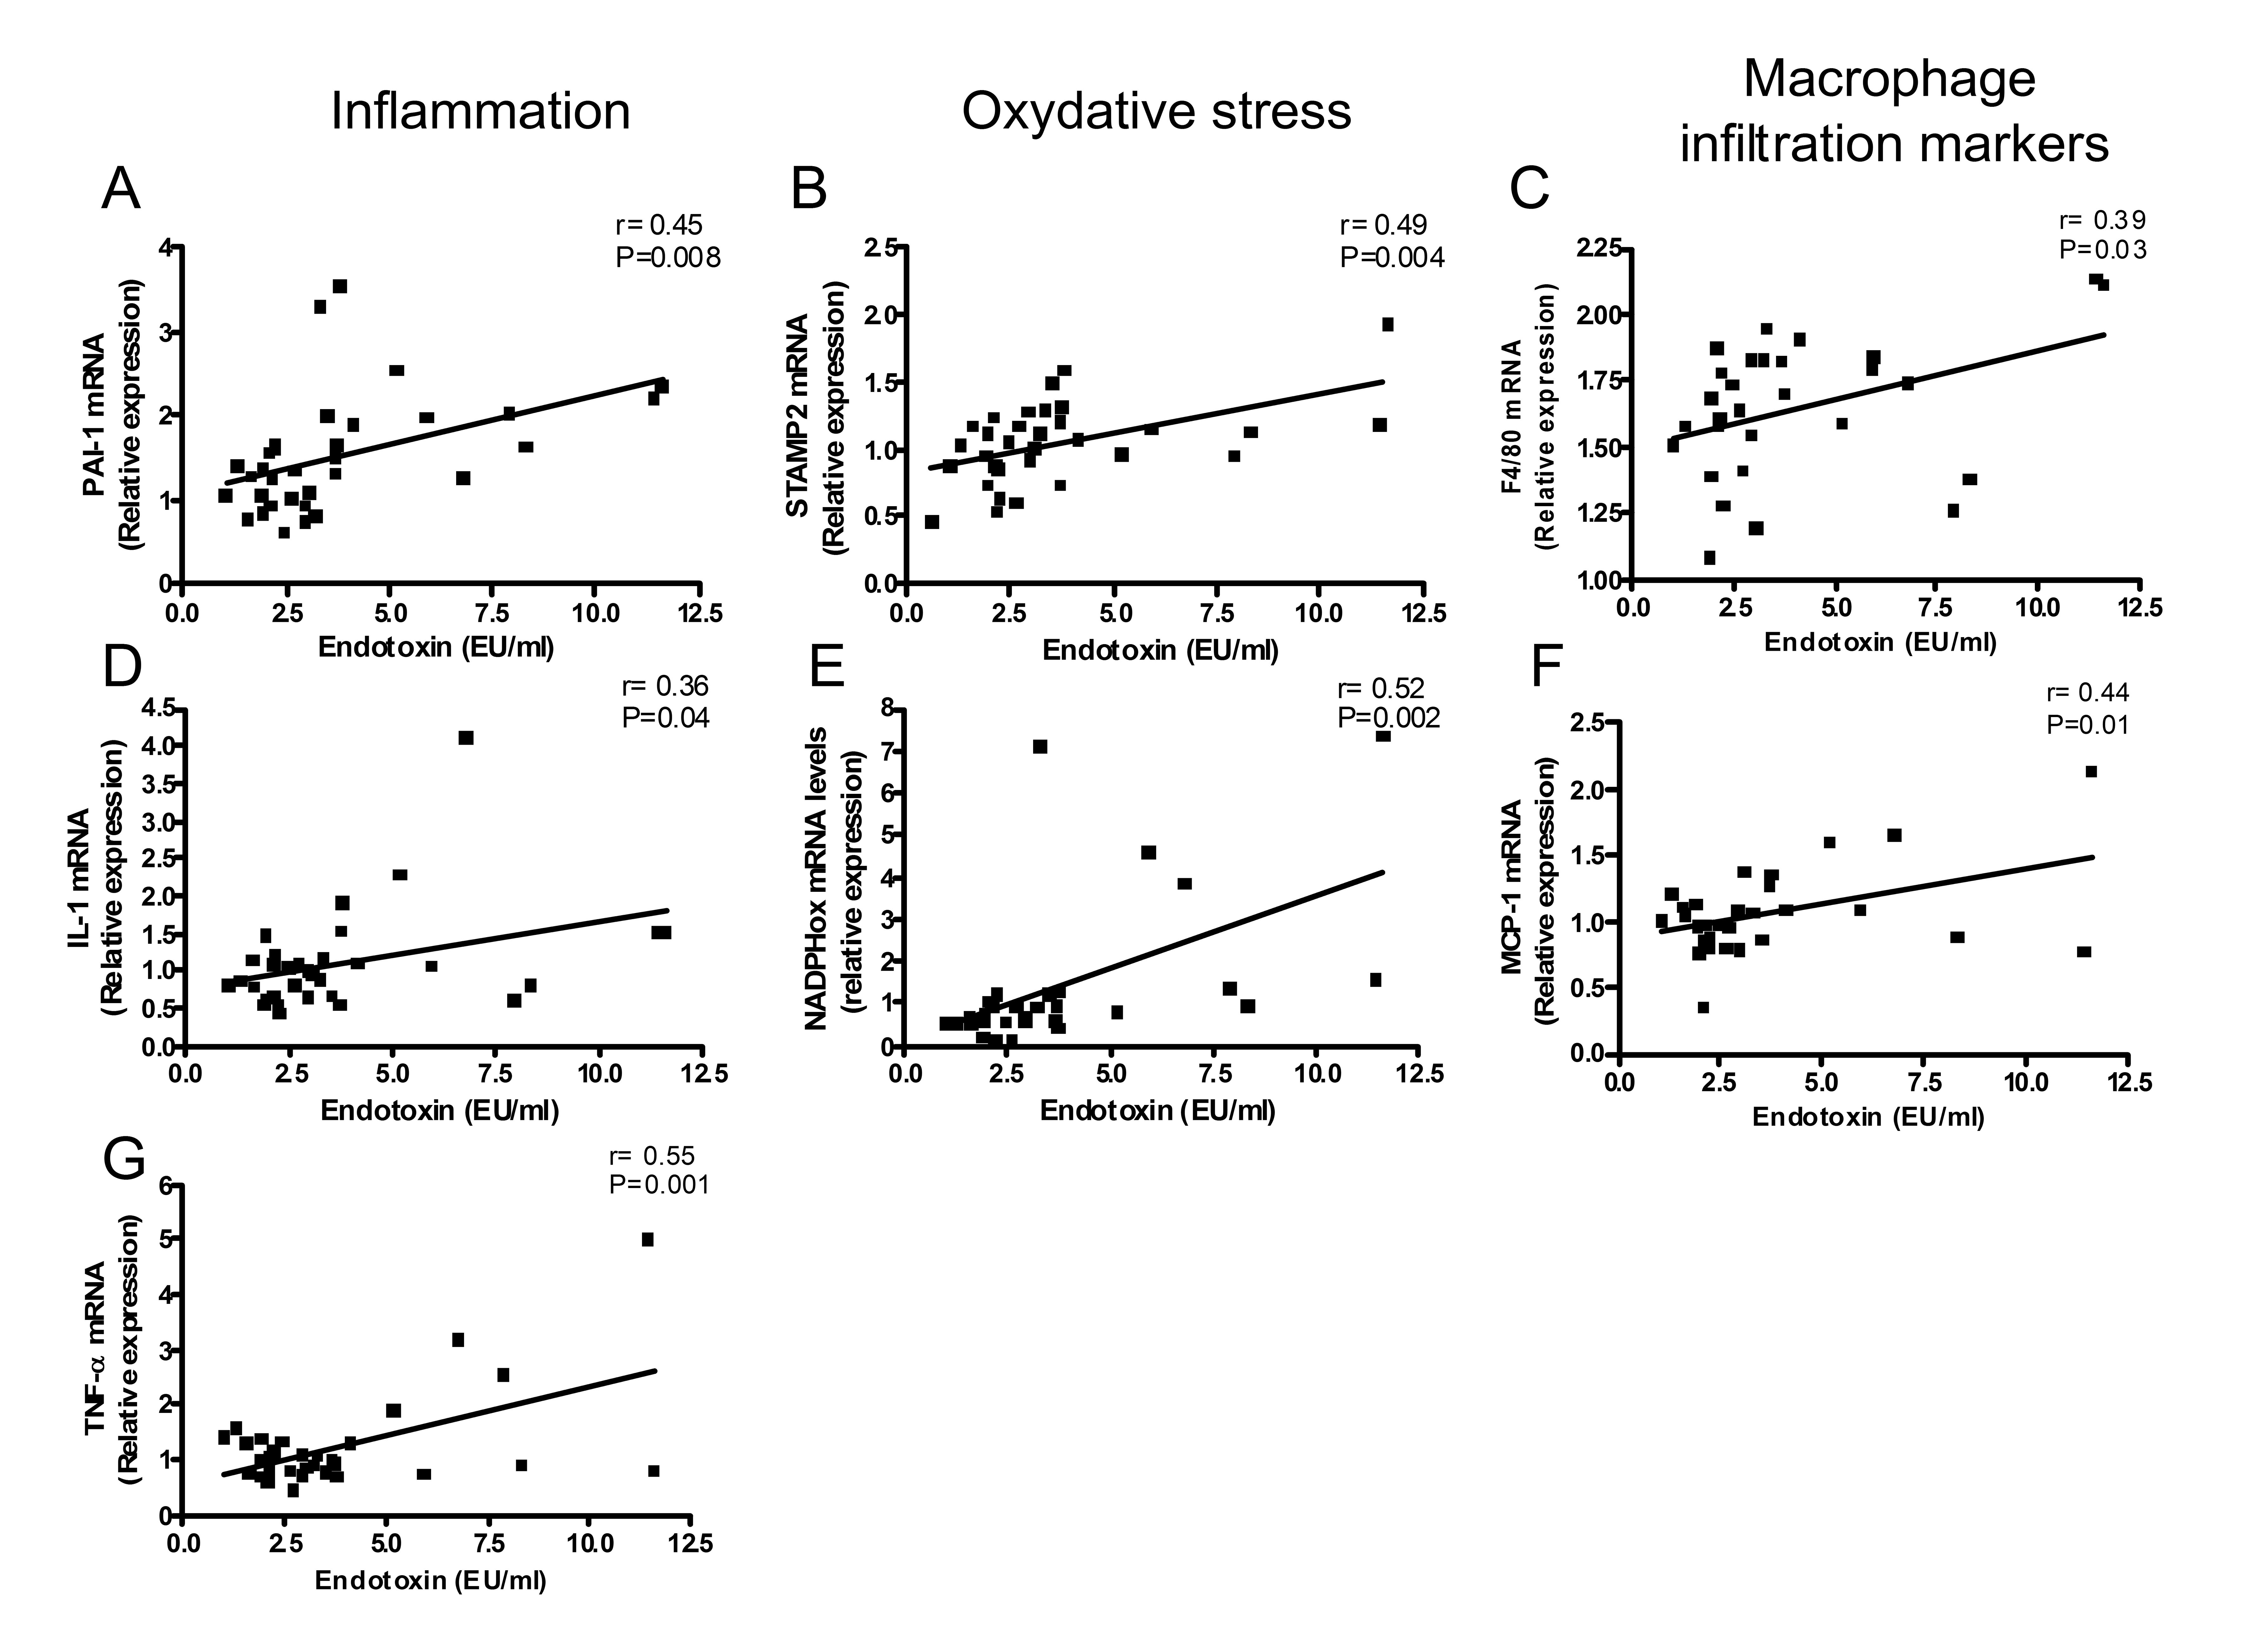
 **Supplemantal data 1: Metabolic endotoxemia positively correlated with inflammation, oxidative stress and macrophage infiltration markers.**

Correlations between plasma endotoxin (LPS, EU/ml) ***A***: PAI-1 mRNA, ***B*** :STAMP2 mRNA, ***C***: F4/80 mRNA, ***D***: IL-1 mRNA, ***E***: NADPHox mRNA, ***F***: MCP-1 mRNA, ***G***: TNF-α mRNA concentrations in the visceral adipose depots of normal-diet (CT), normal-diet and antibiotics (CT-Ab), high-fat diet (HF) or high-fat diet and antibiotic fed (HF-Ab) mice for 4 weeks.*P<*0.05, *inset* corresponds to Pearson’s r correlation and corresponding P value.


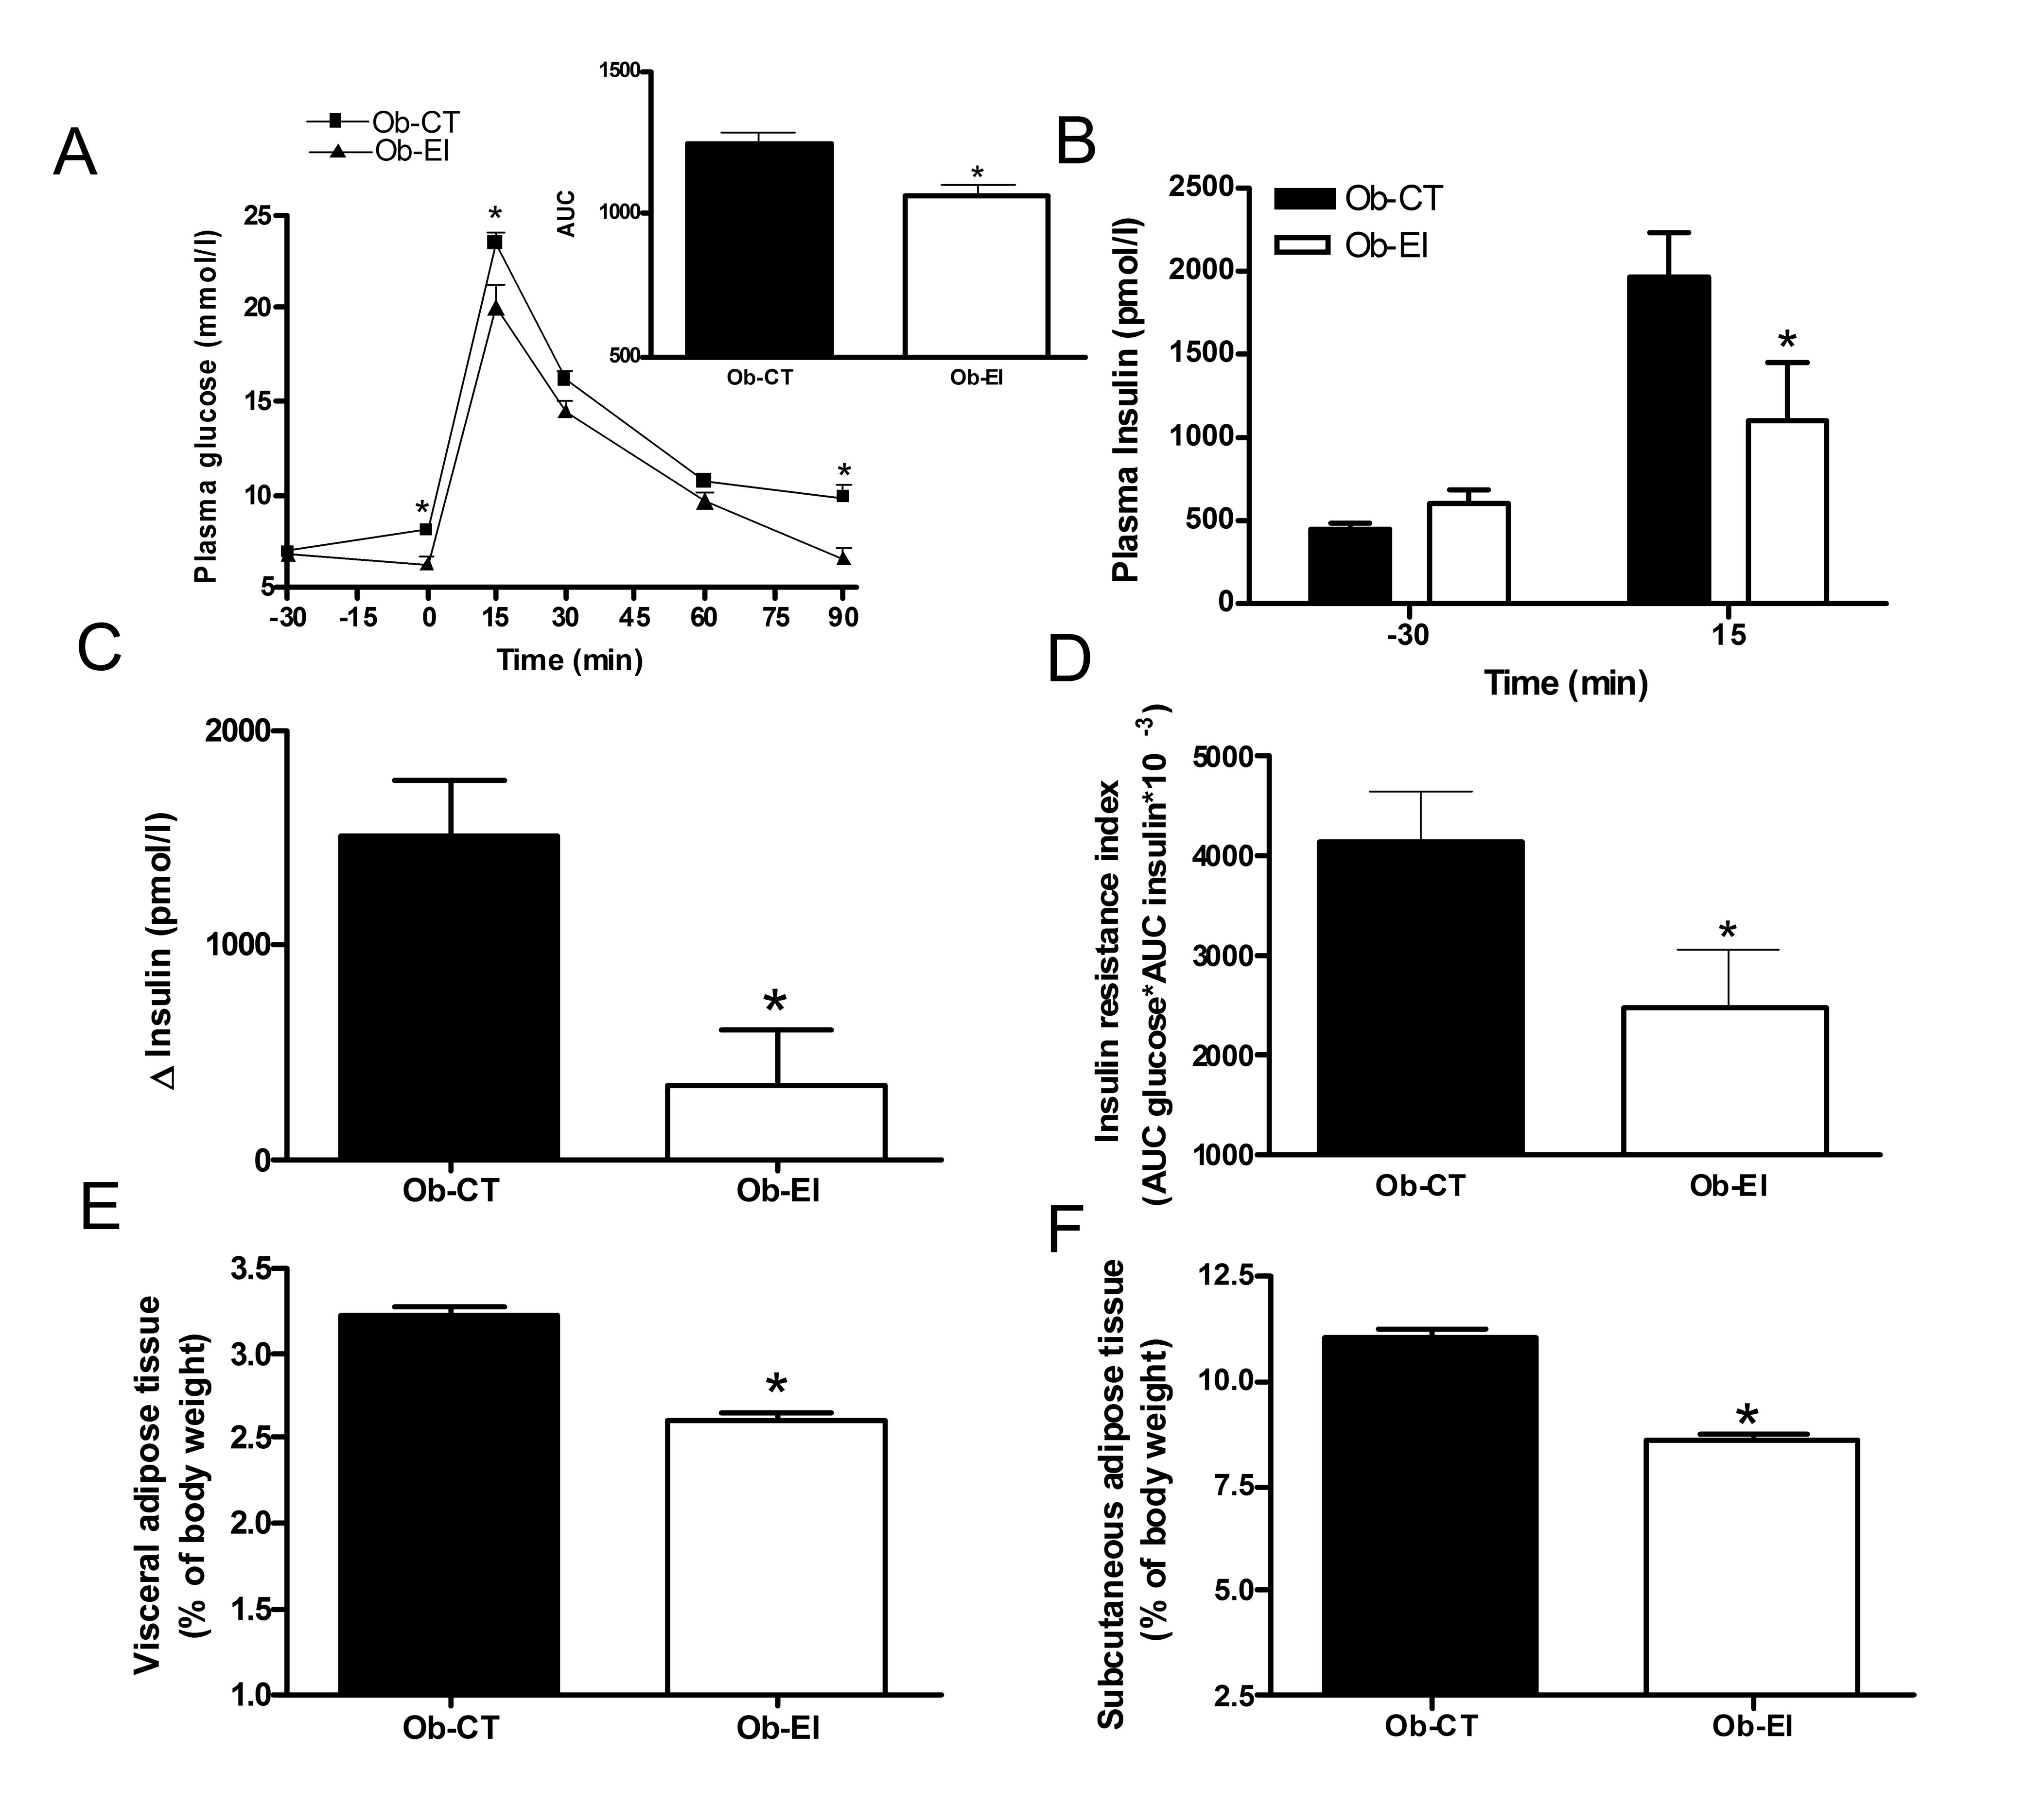


**Supplemental data 2: *ob/ob* mice treated with endotoxin inhibitor (EI: 0.1mg/kg) administered via osmotic mini-pumps for four weeks improved metabolic parameters.**

***A***: Plasma glucose (mmol/l) following an oral glucose load (1g/kg) in *ob/ob* (Ob), *ob/ob* treated with an endotoxin inhibitor (polymixin B) (Ob-EI) for 4 weeks, the inset represents the area under curve (AUC) of the same groups. ***B*:** Plasma insulin concentration (pmol/l) 30 minutes before (-30) and 15 minutes after (15) oral glucose administration of the same groups. ***C***: Glucose induced-insulin secretion after oral glucose administration. ***D*:** Insulin resistance index. ***E:*** Visceral adipose tissue weight (% of body weight). ***F*:** subcutaneous adipose tissue weight (% of body weight) in the same groups. Data are mean±SE. Data are significantly different *P<*0.05, according to the t-test statistical analysis.
